# Supplementary material
Source: Research Square preprint supplement (doi:10.21203/rs.3.rs-9269364/v1)
Supplement: Supplementary file 1 [file e9a244d4b3efa2a713bc7263.docx]

**SUPPLEMENTARY MATERIALS**

**TABLES**

**Table 1: Treatments Indicating BAP / NAA Combinations**

| **Treat** | **Description** | **Treat** | **Description** |
| --- | --- | --- | --- |

T1 0mg L⁻¹ NAA + 0mg L⁻¹ BAP T14 3.0mg L⁻¹ NAA +1.0mg L⁻¹ BAP

T2 1.0mg L⁻¹ NAA + 0mg L⁻¹ BAP T15 4.0mg L⁻¹ NAA + 1.0mg L⁻¹ BAP

T3 2.0mg L⁻¹ NAA + 0mg L⁻¹ BAP T16 0mg L⁻¹ NAA + 1.5mg L⁻¹ BAP

T4 3.0mg L⁻¹ NAA + 0mg L⁻¹ BAP T17 1.0mg L⁻¹ NAA + 1.5mg L⁻¹ BAP

T5 4.0mg L⁻¹ NAA + 0mg L⁻¹ BAP T18 2.0mg L⁻¹ NAA + 1.5mg L⁻¹ BAP

T6 0mg L⁻¹ NAA + 0.5mg L⁻¹ BAP T19 3.0mg L⁻¹ NAA + 1.5mg L⁻¹ BAP

T7 1.0mg L⁻¹ NAA + 0.5mg L⁻¹ BAP T20 4.0mg L⁻¹ NAA + 1.5mg L⁻¹ BAP

T8 2.0mg L⁻¹ NAA + 0.5mg L⁻¹ BAP T21 0mg L⁻¹ NAA + 2.0mg L⁻¹ BAP

T9 3.0mg L⁻¹ NAA + 0.5mg L⁻¹ BAP T22 1.0mg L⁻¹ NAA + 2.0mg L⁻¹ BAP

T10 4.0mg L⁻¹ NAA + 0.5mg L⁻¹ BAP T23 2.0mg L⁻¹ NAA + 2.0mg L⁻¹ BAP

T11 0mg L⁻¹ NAA + 1.0mg L⁻¹ BAP T24 3.0mg L⁻¹ NAA + 2.0mg L⁻¹ BAP

T12 1.0mg L⁻¹ NAA + 1.0mg L⁻¹ BAP T25 4.0mg L⁻¹ NAA + 2.0mg L⁻¹ BAP

T13 2.0mg L⁻¹ NAA + 1.0mg L⁻¹ BAP
